# Supplementary material for: Deglacial sea-level history of the East Siberian Sea Margin
Source: Copernicus journal article supplement (doi:10.5194/cp-2017-19), 2017-03-29
Supplement: Supplementary file 1 [file Appendix-A-CroninSWERUS-SL-Paper.xlsx]

## Sheet: Readme
Data for Climates of the Past article
Manuscript Title		Deglacial (12.8-10.7 ka) sea-level history of the East Siberian Sea Margin
Authors*		Thomas M. Cronin1, Martin Jakobsson2, Matt O’Regan2, Christof Pearce2, Laura Gemery1, Michael Toomey1, Jan Backman2, Igor Semiletov3
Abstract		Abstract. Deglacial (12.8-10.7 ka) sea-level history on the East Siberian continental shelf/upper continental slope was reconstructed using new geophysical records and sediment cores taken during the 2014 SWERUS C3 Leg 2 expedition. The focus of this study was two cores from the Herald Canyon Transect (piston core SWERUS-L2-4-PC1 (4-PC) and multicore SWERUS-L2-4-MC1, both at 72° 50.3447' N, 175° …
Core Data from Table 1
Table 1. SWERUS C3 Leg 2 Core Data
Core ID	Lat (N)_aft deck	Long_aft deck	LatDec_from time	LonDec_from time	WD (m)	Length (m)	Recovery (%)
SWERUS-L2-2-PC1	72° 30.001'	175° 19.170' W	72.5166	-175.32	57	8.24	83.6
SWERUS-L2-4-PC1	72° 50.3447'	175° 43.6383' W	72.8387	-175.727	119.7	6.13	68
SWERUS-L2-4-MC1	72.8608333333333'	-175.711	72.8608	-175.711	123.6	0.1	NA
SWERUS-L2-5-GC1	72° 52.1769'	176° 12.4630' W	72.8699	-176.207	115.5	1.43	48
SWERUS-L2-20-GC1	77° 21.5370'	163° 02.0226' E	77.3591	163.033	115	0.83	14
SWERUS-L2-22-PC1	78° 13.3728'	164° 27.7194' E	78.2229	164.462	364	6.45	72
SWERUS-L2-23-GC1	78° 39.6556'	165° 00.9492' E	78.6609	165.016	508	4.06	68
SWERUS-L2-24-GC1	78° 47.81544'	165° 21.9861' E	78.7969	165.367	964	4.05	68
GEOGRAPHIC REGION: Central Arctic Ocean
PERIOD OF RECORD: Quaternary
LIST OF FILES: benthic foraminiferal and ostracode microfaunal data
*Author Affiliations
1US Geological Survey MS926A, Reston, Virginia, 20192, USA
2Department of Geological Sciences and Bolin Centre for Climate Research, Stockholm University, Stockholm, 10691, Sweden
3Tomsk National Research Polytechnic University, Tomsk, Russia

## Sheet: 20GCForams
Core	Section	cm (top)	cm (base)	CompDepth (cm)	I. teretis	C. reniforme	E. incertum	E. subarcticum	E. excavatum clavatum	E. bartleti	Haynesina orbiculare	Quinqueloculina seminulem	Buccella frigida	Pyrgo williamsoni	Spiroplectammina biformis	Spiroplectammina earlandi	Textularia torquata	Stainforthia loeblichi	Biserial Foram	Stanforthia feylingi	Dentalina	Nonion labridoricum	Polymorphinids	Round transparent	Agglutinated indet.	Nonion agg.	Lagena mollis	Elphidium agg. Small	Elphidium agg. Large	Triloculina	Cyclogyra	Quinqueloculina arctica	Trochammina	Agglutinated braid	Total	Planktic
SWERUS-L2-20GC	CC	2	4	54	11	55	8	21	7	19	5	2		3				5				1	3						3	2					145	1
SWERUS-L2-20GC	CC	6	8	56	3	12		6	3	14	1	1	1	2									1					1	1						46	1
SWERUS-L2-20GC	CC	18	20	70	8	49	21	39	8	12	2	2	2	4				4										1	2						154	2
SWERUS-L2-20GC	CC	20	22	72	6	19	21	5	4	4	1			1															6						67
SWERUS-L2-20GC	CC	22	24	74	15	31	17	14	5	3	2		2					2													2				93	1
SWERUS-L2-20GC	CC	27	29	79	5	38	12	22	10	11	6		3	7				3							3					1					121

## Sheet: 20GCOstracodes
Core	Section	cm (top)	cm (base)	CompDepth (cm)	Acanthocythereis dunelmensis (Norman 1869) sensu lato	Bythocythere constricta Sars 1866	Cytheromorpha macchesneyi (Brady and Crosskey 1871)	Cytheropteron arcuatum Brady, Crosskey & Robertson 1874	Cytheropteron biconvexa Whatley and Masson 1979	Cytheropteron champlainum Cronin 1981	Cytheropteron paralatissimum Swain 1963	Cytheropteron porterae Whatley and Coles 1987	Cytheropteron pyramidale Brady 1868	Cytheropteron sulense Lev 1972	Cytheropteron suzdalskyi Lev 1972	Cytheropteron tumefactum Lev 1972	Cytheropteron spp.	Heterocyprideis sorbyana (Jones 1857)	Kotoracythere arctoborealis Schornikov and Zenina 2006	Krithe hunti Yasuhara, Stepanova, Okahashi, Cronin and Brouwers 2014	Paracyprideis pseudopunctillata Swain 1963	Polycope spp.	Rabilimis mirabilis (Brady 1868)	Roundstonia globulifera (Brady 1868)	Sarsicytheridea bradii (Norman 1865)	Sarsicytheridea punctillata (Brady 1865)	Semicytherura complanata (Brady, Crosskey & Robertson 1874)	Semicytherura spp.	Other	Indeterminate/IRO	Total
SWERUS-L2-20GC	CC	2	4	54-56				1			1					1		1													4
SWERUS-L2-20GC	CC	6	8	56-58																					2						2
SWERUS-L2-20GC	CC	10	12	62-64																											0
SWERUS-L2-20GC	CC	14	16	66-68																											0
SWERUS-L2-20GC	CC	18	20	70-74	2																4		3			1					10
SWERUS-L2-20GC	CC	20	22	72-74																											0
SWERUS-L2-20GC	CC	22	24	74-76																			3								3
SWERUS-L2-20GC	CC	27	29	79-81						1						1		1		2					2	1					8
SWERUS-L2-20GC	CC			bottom	4	1		1		3		1				3		2					13				3	1			32
																															59

## Sheet: 4PCForams
Core	Section	cm (top)	cm (base)	CompDepthCM	AGE-(cal yrs BP)	ERROR (YRS)	I. teretis	C. reniforme	E. incertum	E. subarcticum	E. excavatum clavatum	E. bartleti	Haynesina orbicular	Quinqueloculina seminulem	Buccella frigida	Pyrgo williamsoni	Spiroplectammina biformis	Spiroplectammina earlandi	Textularia torquata	Stainforthia loeblichi	Biserial Foram	Stanforthia feylingi	Dentalina	Nonion labridoricum	Polymorphinids	Round transparent	Agglutinated indet.	Nonion agg.	Lagena mollis	Elphidium agg. Small	Elphidium agg. Large	Triloculina	Cyclogyra	Quinqueloculina arctica	Trochammina	Agglutinated braid	Total	Planktic
SWERUS-L2-4-PC1	2	15	17	67	324.5	62.9		36	4	7	72	5	7		45		7	1		2	8	5				1									4		204
SWERUS-L2-4-PC1	2	75	77	127	682.7	81.3		16	3	9	112	8	1		39		13				1	4			1			2		1					8		218
SWERUS-L2-4-PC1	2	135	137	187	1040.8	99.7		26	7	5	108		12		10		4				6	16		10	4				1	1					11		221
SWERUS-L2-4-PC1	3	15	17	217	1390.3	104.9		38	11	2	84	3	1		27		6				2	7		7	5										8		163
SWERUS-L2-4-PC1	3	75	77	277	2165.8	113.4		20	3	2	95		2	1	20		13				2	4		16	2										24		204
SWERUS-L2-4-PC1	3	135	137	337	2941.3	121.9		156	41	8	349	3	51		60		59				26	66	2	8	16		2	60		3	1				81		992	2
4PCForams	4	0	2	352	3081.8	164.4											30						1					5		12					27		75
SWERUS-L2-4-PC1	4	5	7	357	3128.6	178.6											4		1				1												1		7
SWERUS-L2-4-PC1	4	10	12	362	3175.4	192.8											4						1												2		7
SWERUS-L2-4-PC1	4	15	17	367	3222.3	207			1	7	120		3		32		4				4	18	1	6	3					3	2				10		214
SWERUS-L2-4-PC1	4	20	22	372	3269.1	221.1											1																				1
SWERUS-L2-4-PC1	4	25	27	377	3315.9	235.3					1						1						1					4									7	1
SWERUS-L2-4-PC1	4	35	37	387	3409.5	263.6																	2	1													3
SWERUS-L2-4-PC1	4	40	42	392	3456.4	277.8					1						1						1					1							1		5
SWERUS-L2-4-PC1	4	45	47	397	3503.2	292	4	29			271		18		39		1			4			5	11	3			2		2							389	1
SWERUS-L2-4-PC1	4	50	52	402	10911.7	241.5					37		2		5		2						1	2	2			4		6					1		62
SWERUS-L2-4-PC1	4	55	57	407	10978.4	209.9	1	3			50		4		9		1							4	1												73
SWERUS-L2-4-PC1	4	60	62	412	11045.1	178.4	2	12		5	31	14	11		4					2	1	1			2					1						1	87	1
SWERUS-L2-4-PC1	4	65	67	417	11111.8	146.8	2	27	2	4	9	20	3		2					2		1		1	5										1		79	3
SWERUS-L2-4-PC1	4	70	72	422	11187.6	158.9	9	29				51	8	1	7		2			2					4				1						2		116
SWERUS-L2-4-PC1	4	75	77	427	11263.4	171.1	22	116	22	11	21	106	21	29	25	25	18					52			3	1		1		6	1		6		9	1	496	17
SWERUS-L2-4-PC1	4	80	82	432	11339.2	183.2	37	32	9			113	35		34	2	4				1	9								1							277	1
SWERUS-L2-4-PC1	4	85	87	437	11415.1	195.3	13	29	4	6	6	70	2		26	6	16					77	1							1					6		263	3
SWERUS-L2-4-PC1	4	90	92	442	11490.9	207.4	24	26	10	4	13	32	15	1		4	6					94													3		232	2
SWERUS-L2-4-PC1	4	95	97	447	11566.7	219.5		7	7	3	3	16	3			2						1													5		47
SWERUS-L2-4-PC1	4	100	102	452	11642.5	231.6	1	16		3	11	15	4			6																					56
SWERUS-L2-4-PC1	4	105	107	457	11718.3	243.7		34	4	2	35	11	4	1		5	13			3		4													30		146
SWERUS-L2-4-PC1	4	110	112	462	11794.2	255.8	3	80	32	6	33	47	8	6	3	7	6			1		3			1										4		240
SWERUS-L2-4-PC1	4	115	117	467	11870	267.9	4	37		1	20	12	3	5	2	3	2																		1		90
SWERUS-L2-4-PC1	5	0	2	474	11924.2	265.7		29	10	3	85	10	1		14					1		3		1	2										6		165
SWERUS-L2-4-PC1	5	5	7	479	11963	264.1	9	261	83	0	56	49	3	25	7	36	2					6	1		2										2		542
SWERUS-L2-4-PC1	5	10	12	484	11992	264.2	1	111	12	9	57	19	6	7	11	8	6													1	1						249	4
SWERUS-L2-4-PC1	5	15	17	489	12020.9	265		57	6	1	12	4	4	4	1	3	19					2								2			1		1		117
SWERUS-L2-4-PC1	5	20	22	494	12049.7	265.9	1	72	6	5	45	18	7	1	6	5	1					2		1	2								1		4		177
SWERUS-L2-4-PC1	5	25	27	499	12078.6	266.8	2	109	11	4	51	4	8		15	11	1					3			2									2	2		225
SWERUS-L2-4-PC1	5	30	32	504	12140.7	286.3	12	149	4	6	45	39	8		22	8	7			2		22	1		2										6		333	1
SWERUS-L2-4-PC1	5	35	37	509	12202.7	305.9						3																									3
SWERUS-L2-4-PC1	5	40	42	514	12264.8	325.4		2	8	1		15	3																								29
SWERUS-L2-4-PC1	5	45	47	519	12326.9	345		13	6		7	14		1		2																					43
SWERUS-L2-4-PC1	5	50	52	524	12389	364.6		31	4	3	22	17			4	4	2			1					2				1						1		92
SWERUS-L2-4-PC1	5	55	57	529	12451	384.1		34	4		7	8	1		1		5					1		2	1						1				10		75
SWERUS-L2-4-PC1	5	60	62	534	12513.1	403.7		3	9	5		25				1	50									1		1							6		101
SWERUS-L2-4-PC1	5	65	67	539	12575.2	423.2		5	5			18	1		1												2		2								34
SWERUS-L2-4-PC1	5	70	72	544	12637.3	442.8		2	19			16	2				24																		6		69
SWERUS-L2-4-PC1	5	75	77	549	12699.3	462.3		6	7			18	2				3												1						3		40
SWERUS-L2-4-PC1	5	80	82	554	12761.4	481.9						8				3										1											12
SWERUS-L2-4-PC1	5	85	87	559	12823.5	501.4					1	8	1																								10
SWERUS-L2-4-PC1	5	90	92	564	12885.6	521		4	8		5	11	1			1	5								1										1		37
SWERUS-L2-4-PC1	5	95	97	569	12947.6	540.6						11	2																								13
SWERUS-L2-4-PC1	5	100	102	574	13009.7	560.1						25			1		2																		1		29
SWERUS-L2-4-PC1	5	105	107	579	13071.8	579.7		2				21					5																				28
SWERUS-L2-4-PC1	5	110	112	584	13133.9	599.2	1	2		2	2	39	2		1																						49
SWERUS-L2-4-PC1	5	115	117	589	13195.9	618.8		3	7		2	4	3			1																					20
SWERUS-L2-4-PC1	5	120	122	594	13258	638.3		8	7		5	35	1				4										1										61
SWERUS-L2-4-PC1	5	125	127	599	13320.1	657.9		9	19	3	16	5	1																								53
SWERUS-L2-4-PC1	5	130	132	604	13382.2	677.5		5	15	3	4	20	1		1		1														1						51
SWERUS-L2-4-PC1	5	135	137	609	13444.2	697		4	11			9	6				1																				31

## Sheet: 4PCOstracodes
Core	Section	cm TOP	cm BOT	Composite core depth (cm)	AGE (cal yrs BP)	ERROR (yrs)	Acanthocythereis dunelmensis (Norman 1869) sensu lato	Baffinicythere howei Hazel 1967	Bythocythere spp	Cytheromorpha macchesneyi (Brady and Crosskey 1871)	Cytheropteron arcuatum Brady, Crosskey & Robertson 1874	Cytheropteron biconvexa Whatley and Masson 1979	Cytheropteron paralatissimum Swain 1963	Cytheropteron pyramidale Brady 1868	Cytheropteron sulense Lev 1972	Cytheropteron suzdalskyi Lev 1972	Cytheropteron tumefactum Lev 1972	Cytheropteron spp.	Kotoracythere arctoborealis Schornikov and Zenina 2006	Krithe hunti Yasuhara, Stepanova, Okahashi, Cronin and Brouwers 2014	Paracyprideis pseudopunctillata Swain 1963	Polycope spp.	Rabilimis mirabilis (Brady 1868)	Roundstonia globulifera (Brady 1868)	Sarsicytheridea bradii (Norman 1865)	Sarsicytheridea punctillata (Brady 1865)	Semicytherura complanata (Brady, Crosskey & Robertson 1874)	Semicytherura spp.	Semicytherura undata (Sars 1866)	Other	Indeterminate/IRO	Total
SWERUS-L2-4-PC1	4	0	2	352	3081.8	164.4				1							1															2
SWERUS-L2-4-PC1	4	5	7	357	3128.6	178.6																										0
SWERUS-L2-4-PC1	4	10	12	362	3175.4	192.8			3	7	7	1									3						2					23
SWERUS-L2-4-PC1	4	15	17	367	3222.3	207	1			6	1		2						2		1											13
SWERUS-L2-4-PC1	4	20	22	372	3269.1	221.1																										0
SWERUS-L2-4-PC1	4	25	27	377	3315.9	235.3																										0
SWERUS-L2-4-PC1	4	30	32	382	3362.7	249.5																										0
SWERUS-L2-4-PC1	4	35	37	387	3409.5	263.6																										0
SWERUS-L2-4-PC1	4	40	42	392	3456.4	277.8																										0
SWERUS-L2-4-PC1	4	45	47	397	3503.2	292													2													2
SWERUS-L2-4-PC1	4	50	52	402	10911.7	241.5																										0
SWERUS-L2-4-PC1	4	55	57	407	10978.4	209.9																										0
SWERUS-L2-4-PC1	4	60	62	412	11045.1	178.4												1														1
SWERUS-L2-4-PC1	4	65	67	417	11111.8	146.8												2														2
SWERUS-L2-4-PC1	4	70	72	422	11187.6	158.9												1														1
SWERUS-L2-4-PC1	4	75	77	427	11263.4	171.1															3											3
SWERUS-L2-4-PC1	4	80	82	432	11339.2	183.2	1				3										3											7
SWERUS-L2-4-PC1	4	85	87	437	11415.1	195.3																										0
SWERUS-L2-4-PC1	4	90	92	442	11490.9	207.4				6			1					2		1	8					1	2					21
SWERUS-L2-4-PC1	4	95	97	447	11566.7	219.5																										0
SWERUS-L2-4-PC1	4	100	102	452	11642.5	231.6												1								2						3
SWERUS-L2-4-PC1	4	105	107	457	11718.3	243.7	2			1							1	1										3				8
SWERUS-L2-4-PC1	4	110	112	462	11794.2	255.8	1		1	10			3					3			6	1	1			2	1					29
SWERUS-L2-4-PC1	4	115	117	467	11870	267.9	1		2	6	1	2					1	2						1			2					18
SWERUS-L2-4-PC1	5	0	2	474	11924.2	265.7
SWERUS-L2-4-PC1	5	5	7	479	11963	264.1	2		6	20	1		2		4		2	1			23		2			5	21					89
SWERUS-L2-4-PC1	5	10	12	484	11992	264.2
SWERUS-L2-4-PC1	5	15	17	489	12020.9	265
SWERUS-L2-4-PC1	5	20	22	494	12049.7	265.9	1			1					2						3		2			2	1	1				13
SWERUS-L2-4-PC1	5	25	27	499	12078.6	266.8				4											6			1		2						13
SWERUS-L2-4-PC1	5	30	32	504	12140.7	286.3				5	1	1			1		3	1			20		1			4	2					39
SWERUS-L2-4-PC1	5	35	37	509	12202.7	305.9																										0
SWERUS-L2-4-PC1	5	40	42	514	12264.8	325.4																										0
SWERUS-L2-4-PC1	5	45	47	519	12326.9	345												2														2
SWERUS-L2-4-PC1	5	50	52	524	12389	364.6				1								4			2					2						9
SWERUS-L2-4-PC1	5	55	57	529	12451	384.1												2														2
SWERUS-L2-4-PC1	5	60	62	534	12513.1	403.7																				1						1
SWERUS-L2-4-PC1	5	65	67	539	12575.2	423.2																										0
SWERUS-L2-4-PC1	5	70	72	544	12637.3	442.8																				1						1
SWERUS-L2-4-PC1	5	75	77	549	12699.3	462.3															2											2
SWERUS-L2-4-PC1	5	80	82	554	12761.4	481.9																										0
SWERUS-L2-4-PC1	5	85	87	559	12823.5	501.4																										0
SWERUS-L2-4-PC1	5	90	92	564	12885.6	521																				1						1
SWERUS-L2-4-PC1	5	95	97	569	12947.6	540.6																										0
SWERUS-L2-4-PC1	5	100	102	574	13009.7	560.1																										0
SWERUS-L2-4-PC1	5	105	107	579	13071.8	579.7																										0
SWERUS-L2-4-PC1	5	110	112	584	13133.9	599.2																				2						2
SWERUS-L2-4-PC1	5	115	117	589	13195.9	618.8																				1						1
SWERUS-L2-4-PC1	5	120	122	594	13258	638.3									1						1											2
SWERUS-L2-4-PC1	5	125	127	599	13320.1	657.9												1														1
SWERUS-L2-4-PC1	5	130	132	604	13382.2	677.5															1					1						2
SWERUS-L2-4-PC1	5	135	137	609	13444.2	697			1												1											2
